# Supplementary material
Source: Research Square preprint supplement (doi:10.21203/rs.3.rs-6773620/v1)
Supplement: Supplementary file 1 [file 4690c9230fa6ccb451baef97.docx]

**Appendices**

| Appendix A  Pre and post test result of training group | | | | | | | | | | | | | |
| --- | --- | --- | --- | --- | --- | --- | --- | --- | --- | --- | --- | --- | --- |
|  | | Pre push up | Post push up | Pre sit up | Post sit up | Pre wall squat | Post wall squat | Pre body weight squat | Post body weight squat | Pre cooper | Post cooper | Pre Hoff | Post Hoff |
| 1 | | 24 | 33 | 19 | 26 | 34.84 | 40.32 | 52 | 62 | 2400 | 2640 | 830 | 897 |
| 2 | | 20 | 30 | 18 | 27 | 25.59 | 29.44 | 40 | 54 | 2290 | 2540 | 745 | 813 |
| 3 | | 18 | 29 | 16 | 29 | 27.84 | 20.08 | 32 | 44 | 2420 | 2640 | 785 | 832 |
| 4 | | 21 | 35 | 18 | 32 | 26.48 | 31.56 | 39 | 48 | 2350 | 2540 | 805 | 861 |
| 5 | | 23 | 27 | 16 | 30 | 21.18 | 24.46 | 38 | 47 | 2290 | 2450 | 740 | 785 |
| 6 | | 20 | 26 | 17 | 29 | 20.43 | 21.53 | 45 | 53 | 2030 | 2170 | 630 | 662 |
| 7 | | 17 | 24 | 14 | 24 | 23.86 | 25.33 | 44 | 54 | 2310 | 2490 | 780 | 834 |
| 8 | | 19 | 31 | 17 | 25 | 20.66 | 25.97 | 42 | 49 | 2360 | 2570 | 810 | 867 |
| 9 | | 19 | 21 | 20 | 30 | 24.25 | 30.82 | 39 | 52 | 1980 | 2100 | 595 | 631 |
| 10 | | 15 | 29 | 14 | 25 | 22.31 | 28.45 | 40 | 53 | 1970 | 2070 | 603 | 639 |
| 11 | | 14 | 24 | 16 | 26 | 18.45 | 21.01 | 47 | 56 | 2340 | 2480 | 795 | 827 |
| 12 | | 12 | 20 | 12 | 26 | 24.91 | 28.99 | 29 | 41 | 1980 | 2120 | 593 | 640 |
| Total | Mean | 18.50 | 27.42 | 16.42 | 27.42 | 24.2333 | 27.3300 | 40.58 | 51.08 | 2226.67 | 2400.83 | 725.92 | 774.00 |
| Std. Deviation | 3.555 | 4.621 | 2.275 | 2.503 | 4.33483 | 5.62063 | 6.215 | 5.648 | 179.511 | 219.605 | 92.943 | 100.876 |
|  | | | | | | | | | | | | | |

Appendix B

Pre and post test results of control group

|  | | | | | | | | | | | | | |
| --- | --- | --- | --- | --- | --- | --- | --- | --- | --- | --- | --- | --- | --- |
|  | | Pre push up | Post push up | Pre sit up | Post sit up | Pre wall squat | Post wall squat | Pre body weight squat | Post body weight squat | Pre cooper | Post cooper | Pre Hoff | Post Hoff |
| 1 | | 20 | 22 | 19 | 21 | 33.75 | 34 | 42 | 45 | 1980 | 2010 | 590 | 597 |
| 2 | | 17 | 18 | 18 | 21 | 23.59 | 25 | 36 | 37 | 1900 | 1930 | 560 | 566 |
| 3 | | 18 | 21 | 16 | 20 | 18.11 | 25 | 30 | 31 | 2000 | 2040 | 590 | 600 |
| 4 | | 20 | 20 | 18 | 19 | 27.60 | 26 | 43 | 45 | 2090 | 2130 | 635 | 647 |
| 5 | | 20 | 22 | 18 | 20 | 20.11 | 19 | 40 | 41 | 2070 | 2110 | 630 | 640 |
| 6 | | 22 | 21 | 16 | 18 | 21.82 | 23 | 46 | 40 | 2190 | 2220 | 640 | 648 |
| 7 | | 14 | 16 | 12 | 13 | 23.56 | 26 | 24 | 23 | 1780 | 1770 | 549 | 540 |
| 8 | | 19 | 20 | 17 | 20 | 21.78 | 22 | 38 | 40 | 2110 | 2150 | 628 | 640 |
| 9 | | 13 | 15 | 11 | 12 | 23.91 | 26 | 22 | 24 | 1970 | 1980 | 585 | 587 |
| 10 | | 21 | 20 | 17 | 18 | 20.34 | 24 | 44 | 40 | 2020 | 2040 | 595 | 599 |
| 11 | | 16 | 17 | 13 | 15 | 19.44 | 21 | 33 | 35 | 2150 | 2160 | 635 | 641 |
| 12 | | 16 | 18 | 15 | 16 | 23.17 | 23 | 34 | 31 | 2200 | 2250 | 660 | 668 |
| Total | Mean | 18.00 | 19.17 | 15.83 | 17.75 | 23.0983 | 24.47 | 36.00 | 36.00 | 2038.33 | 2065.83 | 608.08 | 614.42 |
| Std. Deviation | 2.828 | 2.329 | 2.588 | 3.079 | 4.18894 | 3.577 | 7.734 | 7.385 | 122.907 | 133.992 | 34.642 | 38.682 |
|  | | | | | | | | | | | | | |

**8 week training program of the training group**

|  | **Monday** | **Tuesday** | **Wednesday** | **Thursday** | **Friday** | **Saturday** | **Sunday** |
| --- | --- | --- | --- | --- | --- | --- | --- |
| **Week 1** | rest | Strength& endurance | rest | Strength &endurance | rest | Technical &tactical work | Speed &agility |
| **Week 2** | rest | Strength& endurance | rest | Strength & endurance | rest | Technical & tactical work | match |
| **Week 3** | strength | Strength& endurance | rest | Strength & endurance | rest | Technical & tactical work | Speed & agility |
| **Week 4** | strength | Strength& endurance | rest | Strength & endurance | rest | Technical & tactical work | match |
| **Week 5** | strength | Strength& endurance | rest | Strength & endurance | rest | Technical & tactical work | Speed & agility |
| **Week 6** | strength | Strength& endurance | rest | Strength & endurance | rest | Technical & tactical work | match |
| **Week 7** | rest | Strength& endurance | rest | Strength & endurance | rest | Technical & tactical work | Technical & tactical work |
| **Week 8** | rest | Strength& endurance | rest | Strength & endurance | rest | Technical & tactical work | rest |

**Strength training of the training group**

According to Davis total soccer fitness manual(p,33), Players who are new to strength training should spend up to ten weeks Foundational Strength Conditioning by taking this idea as a base, these strength training activities done in the study were selected since their outcome were reported minor muscular hypertrophy.

**Weeks 1, 2, 3, and 4, Tuesday and Wednesday**

Here is the rest interval between each exercise:

- Week 1 = 30 seconds
- Week 2 = 15 seconds
- Week 3 = 15 seconds
- Week 4 = No Rest

| **Legs** | **Arms/Chest/Back** | **Abdominals/Back** |
| --- | --- | --- |
| Squats: 3 sets of 10 reps  Lunges: 3 sets of 8 reps per leg  Power Lunges: 30 reps alternating  Wall-Sits: 3 sets of 1 minute each  Calve raises on stairs: 2 sets of 30  reps | Push-ups: 3 sets of 10  Triceps sit-ups: 3 sets of 10  Pulls-ups: 3 sets of 5 | Crunches: 60 Side  Crunches: 30 per side  Plank: 2 minutes  Bicycles: 2 minutes  Leg Lifts: 30 reps |

**Weeks 5, 6,7, and 8 Tuesday and Wednesday**

Here is the rest interval between each exercise:

- Week 1 = 30 seconds
- Week 2 = 15 seconds
- Week 3 = 15 seconds
- Week 4 = No Rest

| **Legs** | **Arms/Chest/Back** | **Abdominals/Back** |
| --- | --- | --- |
| Squats: 4 sets of 15 reps  Lunges: 4 sets of 10 reps per leg  Power Lunges: 35 reps alternating  Wall-Sits: 4 sets of 1:30 minute each  Calve raises on stairs: 3 sets of 40  Reps | Push-ups: 4 sets of 12  Triceps sit-ups: 4 sets of 12  Pulls-ups: 3 sets of 5 | Crunches: 80  Side Crunches: 40 per side  Plank: 2:30 minutes  Bicycles: 2:30 minutes  Leg Lifts: 40 reps |

**Weeks 3, 4, 5, and 6:** Monday Medicine Ball throws were performed.

**Endurance training program of the training group**

**Hoff Circuit interval training**

It was performed 2 times a week for 8 weeks. According to figure7, trainees start dribble around the cones. Dribble up to hurdles passing the ball underneath and jumping over the top. Dribble around the next set of cones with fewer touches to increase speed. Dribble backwards for 10 meters to the gate, turn and dribble forwards back to start. Each player completes the circuit as quickly as possible keeping close possession of the ball. With a group of players stagger the start keeping at least 3 to 5 yards between each player. Complete 5 circuits back to back. Rest for 2 minutes and repeat for 2-3 sets. The circuit was done for 8 weeks twice a week.

**6 vs 6 drill**

6 vs. 6 small sided game training was performed for the development of endurance of trainees for 1 times a week for 3 weeks 5, 6, and 7.
